# Supplementary material for: Identification of 3,4-didehydrorhodopin as major carotenoid in Rhodopseudomonas species
Source: Royal Society of Chemistry journal article supplement (doi:10.1039/b719272j), 2008-03-13
Supplement: b719272j.pdf [file b719272j.pdf]

## Electronic Supplementary Information

### Identification of 3,4-didehydrorhodopin as major carotenoid in *Rhodopseudomonas* species

Tadashi Mizoguchi, Megumi Isaji, Jiro Harada and Hitoshi Tamiaki\*

Department of Bioscience and Biotechnology, Faculty of Science and Engineering,  
Ritsumeikan University, Kusatsu, Shiga 525-8577, Japan

#### Contents

Details of mass spectrometric analysis.

**Table S1.** Electronic-absorption properties of carotenoids isolated from *Rhodopseudomonas* sp. Rits.

**Table S2.** The  $^1\text{H}$  vicinal coupling constants for 3,4-didehydrorhodopin in  $\text{CDCl}_3$ .

**Figure S1.** Electronic-absorption spectra of each carotenoid found in *Rhodopseudomonas* sp. Rits obtained by on-line PDA.

**Figure S2.** A representative  $^1\text{H}$ -NMR spectrum of the isolated 3,4-didehydrorhodopin in  $\text{CDCl}_3$ .

### **Identification of Cars found in *Rhodopseudomonas* sp. Rits by mass spectrometry**

Table 1 lists the results of mass spectrometry of Cars #1 - #7. The molecular-ion peaks and their fragment peaks originating from the cleavage of terminal groups can be used to identify each Car. More specifically, the fragment peaks at  $[\text{MH}-18]^+$ ,  $[\text{MH}-32]^+$ ,  $[\text{MH}-50]^+$  and  $[\text{MH}-64]^+$  correspond to the cleavage of terminal hydroxy, methoxy, hydroxy-methoxy and two methoxy groups in the molecule. Car #1 possessing  $(\text{C}=\text{C})_{11}$  group exhibits the molecular-ion peak at 537.4 as the protonated form and no detectable fragment peak under present MS conditions. Car #2 possessing  $(\text{C}=\text{C})_{12}$  group exhibits the molecular-ion peak at 567.4 ( $[\text{MH}]^+$ ) and the sole fragment peak at 535.4 ( $[\text{MH}-32]^+$ ). This fragment peak is assigned to the cleavage of a terminal methoxy group in the molecule. Car #3 possessing  $(\text{C}=\text{C})_{13}$  group exhibits the molecular-ion peak at 597.3 ( $[\text{MH}]^+$ ) and two fragment peaks at 565.4 ( $[\text{MH}-32]^+$ ) and 533.3 ( $[\text{MH}-64]^+$ ). These fragment peaks are assigned to the removal of one and two terminal methoxy groups in the molecule. Car #4 possessing  $(\text{C}=\text{C})_{11}$  group and Car #5 possessing  $(\text{C}=\text{C})_{12}$  group exhibit the molecular-ion peaks at 555.3 and 553.3 ( $[\text{MH}]^+$ ) and the sole fragment peaks at 537.4 ( $[\text{MH}-18]^+$ ) and 535.3 ( $[\text{MH}-18]^+$ ), respectively. These fragment peaks are assigned to the cleavage of a terminal hydroxy group in the molecule. Car #6 possessing  $(\text{C}=\text{C})_{12}$  group and Car #7 possessing  $(\text{C}=\text{C})_{13}$  group exhibit the molecular-ion peaks at 585.4 and 583.3 ( $[\text{MH}]^+$ ), respectively, and the three fragment peaks at 567.1 ( $[\text{MH}-18]^+$ ), 553.4 ( $[\text{MH}-32]^+$ ) and 535.3 ( $[\text{MH}-50]^+$ ) for Car #6 and 565.2 ( $[\text{MH}-18]^+$ ), 551.3 ( $[\text{MH}-32]^+$ ) and 533.2 ( $[\text{MH}-50]^+$ ) for Car #7. These fragment peaks are assigned to the cleavage of a terminal hydroxy, a methoxy and hydroxy-methoxy groups in the molecule.

Table S1. Electronic-absorption properties of carotenoids isolated from the cells of *Rhodopseudomonas* sp. Rits.

| Peak #<br>in HPLC | Carotenoid (number of<br>conjugated double bonds) | $\lambda_{\max}$ in the eluent (nm) |                   |                   | $\epsilon$ at $\lambda_{\max}$ in the<br>literature <sup>a</sup><br>( $M^{-1}\cdot cm^{-1}$ ) | $\epsilon$ at 450 nm<br>in the eluent<br>( $M^{-1}\cdot cm^{-1}$ ) |
|-------------------|---------------------------------------------------|-------------------------------------|-------------------|-------------------|-----------------------------------------------------------------------------------------------|--------------------------------------------------------------------|
|                   |                                                   | 0 $\rightarrow$ 2                   | 0 $\rightarrow$ 1 | 0 $\rightarrow$ 0 |                                                                                               |                                                                    |
| 1                 | Lycopene (11)                                     | 445                                 | 484               | 504               | 184,900 <sup>b</sup>                                                                          | 119,700                                                            |
| 2                 | Anhydrorhodovibrin (12)                           | 458                                 | 484               | 516               | 152,800 <sup>b</sup>                                                                          | 96,600                                                             |
| 3                 | Spirilloxanthin (13)                              | 467                                 | 494               | 528               | 147,200 <sup>c</sup>                                                                          | 68,600                                                             |
| 4                 | Rhodopin (11)                                     | 445                                 | 472               | 504               | 165,600 <sup>c</sup>                                                                          | 106,600                                                            |
| 5                 | 3,4-Didehydrorhodopin (12)                        | 458                                 | 484               | 516               | –                                                                                             | 96,600                                                             |
| 6                 | Rhodovibrin (12)                                  | 458                                 | 484               | 516               | –                                                                                             | 96,600                                                             |
| 7                 | OH-Spirilloxanthin (13)                           | 467                                 | 494               | 528               | –                                                                                             | 68,600                                                             |

<sup>a</sup>Data taken from Britton (Ref.15). <sup>b</sup>In petroleum ether. <sup>c</sup>In benzene.

Table S2. The  $^1\text{H}$  vicinal coupling constants<sup>a</sup> (Hz) for 3,4-didehydrorhodopin in  $\text{CDCl}_3$ .

|             |    |             |    |
|-------------|----|-------------|----|
| C3H=C4H     | 16 | C6H-C7H     | 11 |
| C7H=C8H     | 15 | C10H-C11H   | 11 |
| C11H=C12H   | 16 | C14H-C15H   | 11 |
| C11'H=C12'H | 16 | C14'H-C15'H | 11 |
| C7'H=C8'H   | 16 | C10'H-C11'H | 12 |
|             |    | C6'H-C7'H   | 11 |

<sup>a</sup>15H=15'H coupling constant was not determined due to the contribution of long-range coupling via 14H (14'H).

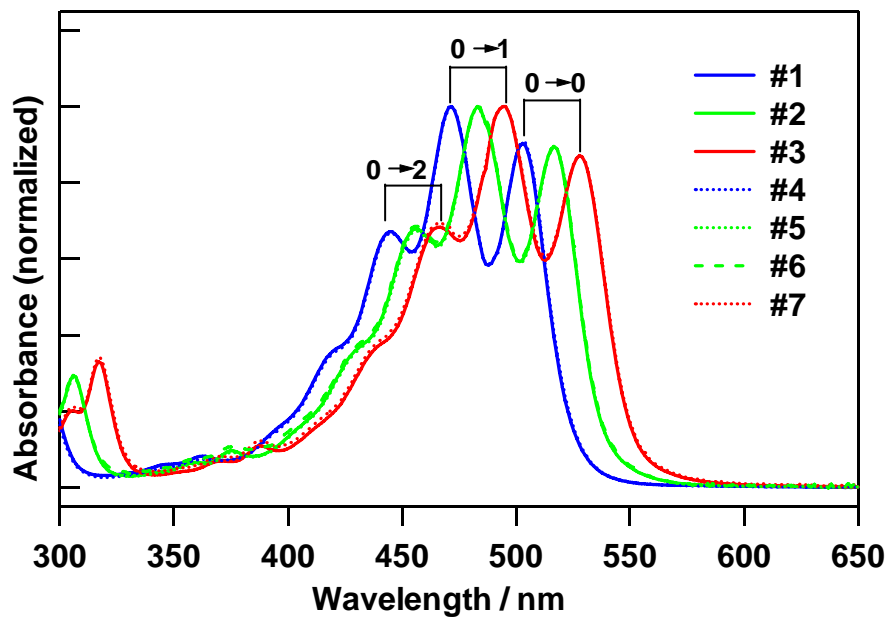

Figure S1. Electronic-absorption spectra of each Car found in *Rhodospseudomonas* sp. Rits obtained by on-line PDA. Numbers in the figure correspond to the HPLC elution order shown in Figure 1.

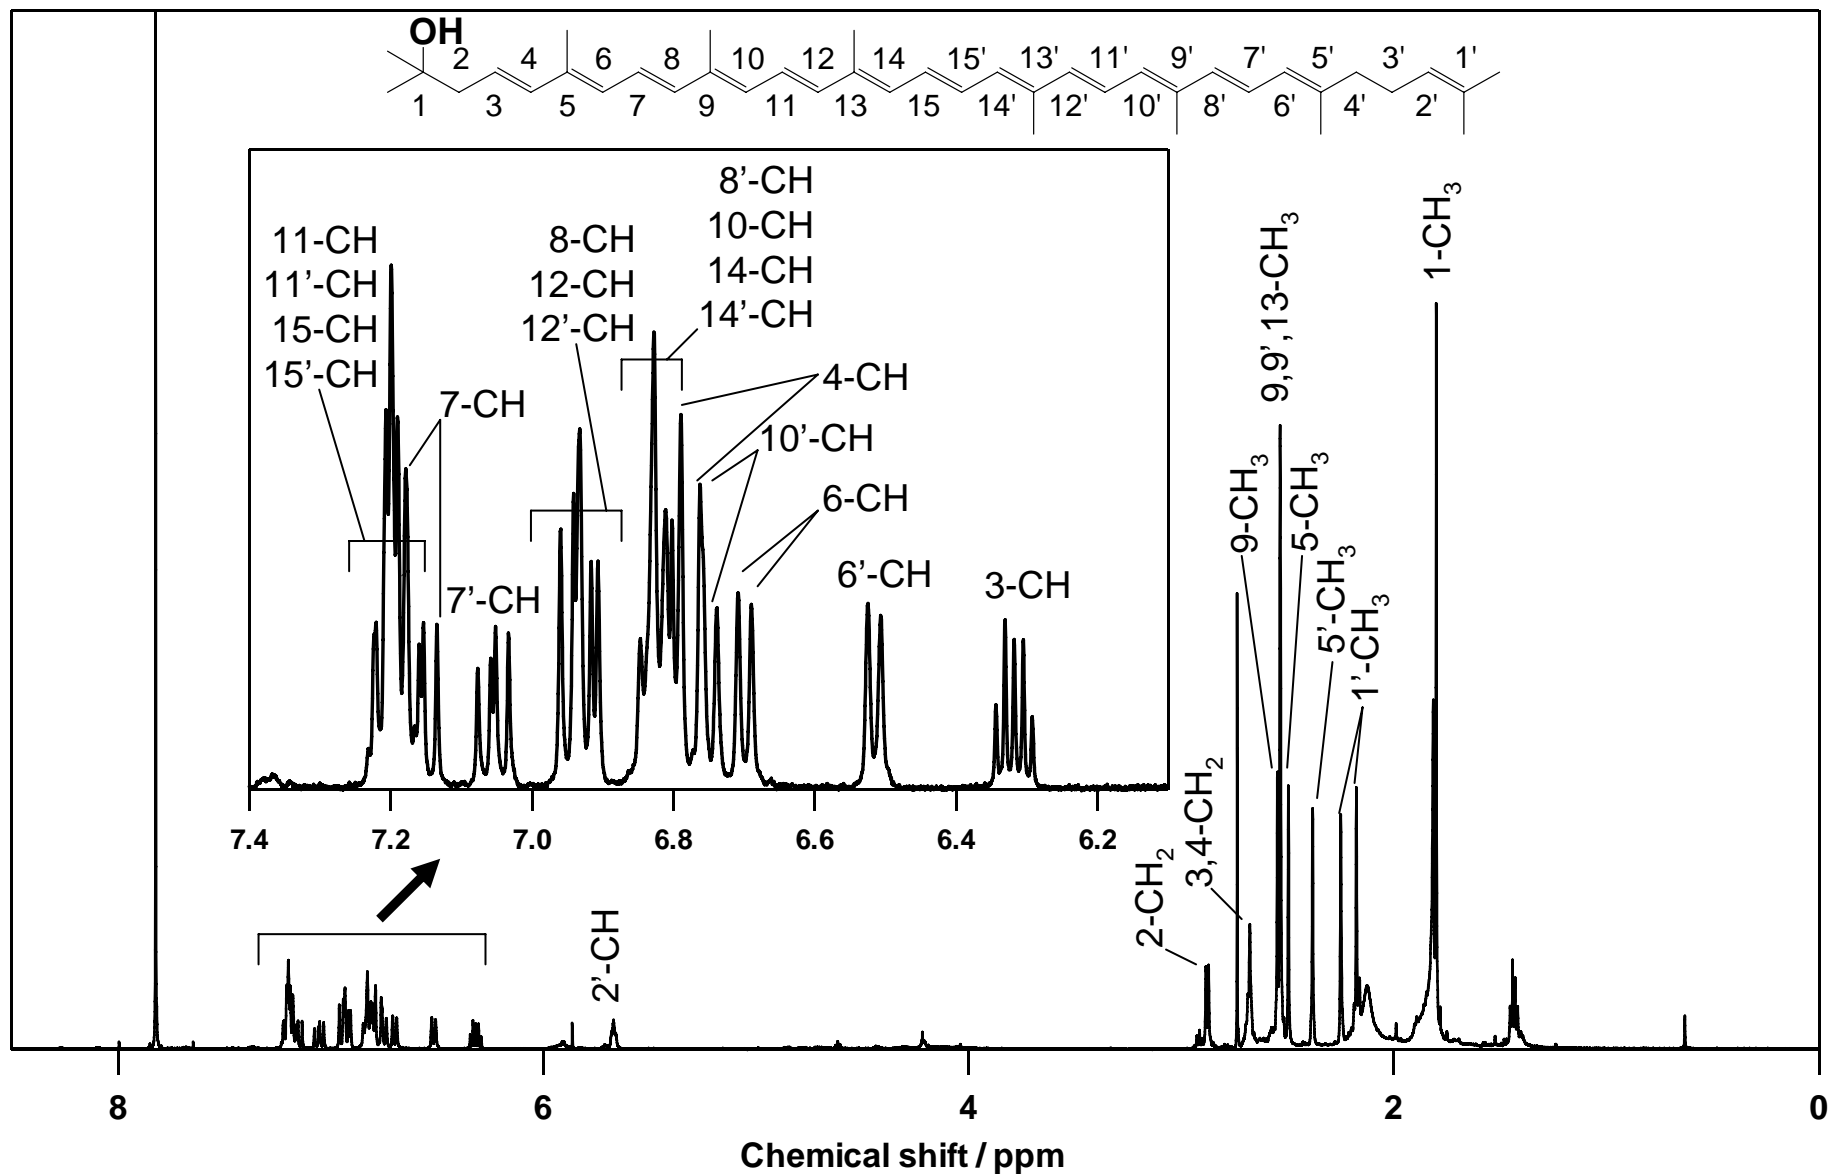

Figure S2. A representative <sup>1</sup>H-NMR spectrum of the isolated 3,4-didehydrorhodopin in CDCl<sub>3</sub> at room temperature.
